# Supplementary material for: Network-Based Elaboration of the Efficacy of the Dachangshu (BL25) and Tianshu (ST25) Points in the Treatment of Functional Constipation in Children through Inflammation, Adipocytokine, or Leptin Pathways
Source: Hindawi journal article supplement (doi:10.1155/2022/5315927), 2022-12-06

| term ID  | term description                                                                                                                                     | observed gene count | background gene count | strength | false discovery rate | matching proteins in your network                                                                                                          | matching proteins in your network (labels)                                                      |
|----------|------------------------------------------------------------------------------------------------------------------------------------------------------|---------------------|-----------------------|----------|----------------------|--------------------------------------------------------------------------------------------------------------------------------------------|-------------------------------------------------------------------------------------------------|
| CL:3641  | IκBα variant leads to EDA-ID                                                                                                                         | 4                   | 5                     | 2.13     | 2.69E-06             | 9606. ENSP00002167<br>97. 9606. E<br>NSP000003<br>84273. 960<br>6. ENSP0000398698,<br>9606. ENSP00040306<br>84                             | NFKB1A, RELA, TNF, IKBKB                                                                        |
| CL:206   | Glial cell line-derived neurotrophic factor receptor, alpha 1/2, and Hirschsprung disease                                                            | 3                   | 5                     | 2.01     | 0.00012              | 9606. ENSP00003475<br>91. 9606. E<br>NSP000003<br>47942. 960<br>6. ENSP0000428518<br>9606. ENSP000002636<br>42. 9606. E<br>NSP000000471896 | GFR1, RET, GFR2                                                                                 |
| CL:5981  | type II transforming growth factor beta receptor binding                                                                                             | 3                   | 5                     | 2.01     | 0.00012              | NSP000003<br>519003,<br>6. ENSP000034133<br>9606. ENSP000033589<br>97. 9606. E<br>NSP000003                                                | TGFB1, TGFB2, TGFB1                                                                             |
| CL:3711  | mixed, incl. interleukin-1 receptor complex, and IRAK4 deficiency (TLK5)                                                                             | 3                   | 7                     | 1.86     | 0.00022              | NSP000003<br>86003. 960<br>6. ENSP00000401399<br>9606. ENSP00002629<br>59. 9606. E<br>NSP000003                                            | IRAK1, IL1R1, MYD88                                                                             |
| CL:23432 | mixed, incl. Fibroblast growth factor 21, and PR domain zinc finger protein 16                                                                       | 2                   | 5                     | 1.83     | 0.0036               | 9606. ENSP00002629<br>59. 9606. E<br>NSP000003                                                                                             | UCP1, PRDM16                                                                                    |
| CL:263   | mixed, incl. Stem cell factor, and Mast/stem cell growth factor receptor                                                                             | 2                   | 5                     | 1.83     | 0.0036               | 9606. ENSP00002282<br>80. 9606. E<br>NSP000003                                                                                             | KITLG, KIT                                                                                      |
| CL:3758  | Caspase recruitment domain, and negative regulation of interferon-beta biosynthetic process                                                          | 2                   | 5                     | 1.83     | 0.0036               | 9606. ENSP000002636<br>42. 9606. E<br>NSP000000471896                                                                                      | IFIH1, IRF3                                                                                     |
| CL:7575  | Orexin receptor family, and Prepro-orexin                                                                                                            | 2                   | 5                     | 1.83     | 0.0036               | 9606. ENSP000002636<br>30. 9606. E<br>NSP000003                                                                                            | HCR1, HCR1                                                                                      |
| CL:7866  | GPCR, family 2, vasoactive intestinal peptide receptor, and Vasoactive intestinal peptide                                                            | 2                   | 5                     | 1.83     | 0.0036               | 9606. ENSP000003272<br>46. 9606. E<br>NSP000003                                                                                            | TRK1, VIP                                                                                       |
| CL:8008  | Urocortin/corticotropin-releasing factor, and corticotrophin-releasing factor receptor activity                                                      | 2                   | 5                     | 1.83     | 0.0036               | 9606. ENSP000003409<br>43. 9606. E<br>NSP000003                                                                                            | CRHR2, CRHR1                                                                                    |
| CL:3710  | IRAK4 deficiency (TLR2/4), and interleukin-1 receptor complex                                                                                        | 5                   | 13                    | 1.82     | 1.05E-06             | 9606. ENSP00000383<br>89. 9606. E<br>NSP000003<br>57997. 960<br>6. ENSP000003<br>86003. 960<br>6. ENSP000003                               | TLR2, IRAK1, TLR4, IL1R1, MYD88                                                                 |
| CL:5967  | mixed, incl. SMAD2/3 Phosphorylation Motif Mutants in Cancer, and transforming growth factor beta receptor, inhibitory cytoplasmic mediator activity | 4                   | 12                    | 1.75     | 2.71E-05             | 9606. ENSP000002219<br>30. 9606. E<br>NSP000003<br>97991. 960<br>6. ENSP000003                                                             | TGFB1, SMAD3, TGFB2, TGFB1                                                                      |
| CL:3724  | MyD88 deficiency (TLR2/4)                                                                                                                            | 2                   | 6                     | 1.75     | 0.0042               | 9606. ENSP000002600<br>10. 9606. E<br>NSP000003                                                                                            | TLR2, TLR4                                                                                      |
| CL:3998  | PI3K Activates STAT3, and Ig-like C2-type domain                                                                                                     | 2                   | 6                     | 1.75     | 0.0042               | 9606. ENSP000002646<br>57. 9606. E<br>NSP000003                                                                                            | STAT3, LEP                                                                                      |
| CL:25184 | Passive transport by Aquaporins                                                                                                                      | 3                   | 10                    | 1.71     | 0.00046              | 9606. ENSP000002196<br>60. 9606. E<br>NSP000003<br>97991. 960<br>6. ENSP000003                                                             | AQP8, AQP3, AQP1                                                                                |
| CL:3982  | mixed, incl. Signaling by Leptin, and Erythropoietin activates Phospholipase C gamma (PLCγ)                                                          | 4                   | 14                    | 1.69     | 4.18E-05             | 9606. ENSP000002<br>64657. 960<br>6. ENSP000003<br>97991. 960<br>6. ENSP000003                                                             | PLCG1, STAT3, LEP, JAK2                                                                         |
| CL:3637  | mixed, incl. IκBα variant leads to EDA-ID, and death-inducing signaling complex assembly                                                             | 6                   | 22                    | 1.67     | 3.23E-07             | 9606. ENSP000002600<br>10. 9606. E<br>NSP000003<br>16797. 960<br>6. ENSP000003<br>97991. 960<br>6. ENSP000003                              | TNFRSF1A, NFKB1A, TNFRSF1B, RELA, TNF, IKBKB                                                    |
| CL:3707  | MyD88-dependent toll-like receptor signaling pathway, and Interleukin-1 conserved site                                                               | 6                   | 22                    | 1.67     | 3.23E-07             | 9606. ENSP000002600<br>10. 9606. E<br>NSP000003<br>16797. 960<br>6. ENSP000003<br>97991. 960<br>6. ENSP000003                              | TLR2, IL1B, TRAK1, TLR4, IL1R1, MYD88                                                           |
| CL:3636  | TAK1 activates NfκB by phosphorylation and activation of IKKs complex, and death-inducing signaling complex assembly                                 | 8                   | 33                    | 1.62     | 2.79E-09             | 9606. ENSP000002617<br>49. 9606. E<br>NSP000003<br>16797. 960<br>6. ENSP000003<br>97991. 960<br>6. ENSP000003                              | TNFRSF1A, NFKB1A, NOD2, TNFRSF1B, RELA, TNF, IKBKB, TRAF6                                       |
| CL:3634  | interleukin-1-mediated signaling pathway, and TIR domain                                                                                             | 14                  | 60                    | 1.6      | 4.13E-16             | 9606. ENSP000002617<br>49. 9606. E<br>NSP000003<br>16797. 960<br>6. ENSP000003<br>97991. 960<br>6. ENSP000003                              | TNFRSF1A, NFKB1A, TLR2, IL1B, IFIH1, NOD2, IRAK1, IL1R1, TNF, MYD88, IKBKB, TRAF6               |
| CL:3955  | mixed, incl. positive regulation of T-helper 17 cell lineage commitment, and Interleukins 4 and 13                                                   | 3                   | 13                    | 1.59     | 0.00075              | 9606. ENSP000002285<br>34. 9606. E<br>NSP000003<br>97913. 960<br>6. ENSP000003                                                             | IL23A, IL4R, IL12RB1                                                                            |
| CL:3633  | I-κappaB kinase/NF-κappaB-mediated signaling pathway                                                                                                 | 17                  | 77                    | 1.57     | 1.63E-18             | 9606. ENSP000002617<br>49. 9606. E<br>NSP000003<br>16797. 960<br>6. ENSP000003<br>97991. 960<br>6. ENSP000003                              | TNFRSF1A, NFKB1A, TICAM1, TLR2, IL1B, IFIH1, NOD2, IRAK1, IL1R1, TNF, MYD88, IKBKB, TRAF6, IRF3 |
| CL:8121  | mixed, incl. Catecholamine signaling, and dopamine catabolic process                                                                                 | 3                   | 16                    | 1.5      | 0.0012               | 9606. ENSP000002617<br>49. 9606. E<br>NSP000003<br>16797. 960<br>6. ENSP000003<br>97991. 960<br>6. ENSP000003                              | SLC6A4, HTR1A, DRD2                                                                             |
| CL:10369 | mixed, incl. neutrophil mediated killing of bacterium, and Pancreatic ribonuclease                                                                   | 2                   | 11                    | 1.49     | 0.0104               | 9606. ENSP000002215<br>15. 9606. E<br>NSP000003<br>25275                                                                                   | RETN, MPO                                                                                       |
| CL:2560  | protein kinase C activity, and osmosensor activity                                                                                                   | 2                   | 11                    | 1.49     | 0.0104               | 9606. ENSP000002633<br>55. 9606. E<br>NSP000003<br>06191                                                                                   | PRKCB, TRPV4                                                                                    |

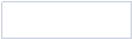

Supplement: f1 [file 5315927.f1.zip › 5315927.f1/Supplementary file 3 (1).pdf]
