# Supplementary material for: Network-Based Elaboration of the Efficacy of the Dachangshu (BL25) and Tianshu (ST25) Points in the Treatment of Functional Constipation in Children through Inflammation, Adipocytokine, or Leptin Pathways
Source: Hindawi journal article supplement (doi:10.1155/2022/5315927), 2022-12-06
Supplement: f1 [file 5315927.f1.zip]

Archive with 3 entries (3 files):
- 5315927.f1/Supplementary file 1 (1).pdf
- 5315927.f1/Supplementary file 2 (1).pdf
- 5315927.f1/Supplementary file 3 (1).pdf
